# Supplementary material for: Cellular entry and uncoating of naked and quasi-enveloped human hepatoviruses
Source: eLife journal article supplement (doi:10.7554/elife.43983), 2019-02-25
Supplement: supp [file elife-43983-supp-v1.zip]

Archive with 23 entries (23 files):
- elife_poa_e43983_Figure_2_figure_supplement_3.tif
- elife_poa_e43983_Figure_4_figure_supplement_2.tif
- elife_poa_e43983_Figure_1_figure_supplement_2.tif
- elife_poa_e43983_Figure_2_figure_supplement_4.tif
- elife_poa_e43983_Figure_1_figure_supplement_4.tif
- elife_poa_e43983_Figure_5_figure_supplement_2.tif
- elife_poa_e43983_Figure_4_figure_supplement_1.tif
- elife_poa_e43983_Figure_5_source_data_1.xlsx
- elife_poa_e43983_Figure_5_figure_supplement_1.tif
- elife_poa_e43983_Figure_1_source_data_1.xlsx
- elife_poa_e43983_Figure_4_source_data_1.xlsx
- elife_poa_e43983_Figure_4_figure_supplement_3.tif
- elife_poa_e43983_Supplementary_File_1.docx
- elife_poa_e43983_Figure_3_figure_supplement_1.tif
- elife_poa_e43983_Transparent_Reporting_File.pdf
- elife_poa_e43983_Figure_1_figure_supplement_3.tif
- elife_poa_e43983_Figure_2_figure_supplement_2.tif
- elife_poa_e43983_Figure_3_source_data_1.xlsx
- elife_poa_e43983_Figure_3_figure_supplement_2.tif
- elife_poa_e43983_Figure_2_figure_supplement_5.tif
- elife_poa_e43983_Figure_1_figure_supplement_1.tif
- elife_poa_e43983_Figure_2_figure_supplement_1.tif
- elife_poa_e43983_Figure_2_source_data_1.xlsx
