# Supplementary material for: Cellular entry and uncoating of naked and quasi-enveloped human hepatoviruses
Source: eLife journal article supplement (doi:10.7554/elife.43983), 2019-02-25
Supplement: supp [file elife-43983-supp-v1.zip › elife_poa_e43983_Figure_1_source_data_1.xlsx]

## Sheet: Figure 1
Rivera-Serrano EE, González-López O, Das A, and Lemon SM - HAV and eHAV entry (eLife 43983)
SOURCE DATA - FIGURE 1
Figure 1A								Figure 1E								Figure 1-figure supplement 3
	HAV RNA/µg total RNA (% Ctrl)								HAV RNA x105/µg total RNA								Naked HAV (HAV RNA/µg RNA)
	Naked HAV			eHAV					Naked HAV			eHAV				sgCtrl	1250000	1320000	1210000
Vehicle	95.36	104.64	96.21	91.51	108.49	97.09		siCtrl	305461	346517	344714	105770	122156	115568		sgITGA1	1490000	1550000	1250000
Chlorpromazine	24.58	20.16	26.47	33.08	27.72	30.66			349370	295725	307319	144515	157768	139950		sgITGA4	1850000	1320000	1970000
Dynasore	62.75	51.07	53	40.93	37.45	38.46		siITGB1	320569	295122	285806	110921	100705	142453		sgITGAV	1370000	1540000	1510000
Filipin	87.77	116	88.54	76.22	72.7	70.8			303447	272820	315127	122104	151710	140281
Dynarrestin	86.08	85.74	101.54	108.26	83.28	93.13
Cytochalasin D	91.5	86.79	95.25	88.82	100.13	98.14
Latrunculin A	107.82	96.46	98.21	91.2	104.76	104.19		Figure 1F
EIPA	99.89	87.24	100.01	91.68	104.67	100.4			HAV RNA/µg total RNA (% sgCtrl)
Wortmannin	111.06	97.6	104.86	92.65	107.47	97.49			Naked HAV			eHAV
NSC23766	106.56	94.35	88.76	93.37	92.51	98.31		sgCtrl	92.66	115.52	91.82	103.59	106.87	89.54
Heparin	105.95	104.47	100.08	105.23	105.4	106.42		sgITGB1	27.19	39.42	37.54	35.3	35.96	38.88
Figure 1B
	HAV RNA/µg total RNA (% siCtrl)							Figure 1G
	Naked HAV			eHAV					HAV GE/µg total RNA
Ctrl	109.83	90.17	93.33	98.63	101.37	94.04			sgCtrl			sgITGB1
CLTC	30.03	29.74	34.33	18.41	16.89	20.84		2 dpi	109000	113000	117000	28100	33500	34700
AP2M1	55.4	58.58	50.2	38.04	42.44	45.54		4 dpi	5140000	5230000	5260000	769000	775000	783000
DNM2	41.18	44.6	44.44	44.72	43.22	39.27		6 dpi	35300000	37600000	34200000	5350000	5110000	4750000
CAV1	119.95	100.83	111.61	77.23	81.16	82.01
FLOT1	98.04	118.59	92.92	70.37	91.58	84.67
ARF6	81.96	78.99	89.69	120.54	102.14	101.13		Figure 1H
									HAV RNA/µg total RNA (% Ctrl)
Figure 1C									Naked HAV			eHAV
	Colocalization Index							Vehicle	113.34	89.51	97.15	88.29	99.09	112.62
	Naked HAV			eHAV				RGD peptide	53.59	62.14	49.55	50.2	45.36	56.57
Clathrin	0.686	0.554	0.759	0.696	0.602	0.71		IgG	105.5	106.91	87.59	122.08	84.85	93.07
	0.674	0.635		0.805	0.782			K-20	101.76	78.72	131.86	86.87	120.17	90.65
CAV1	0.272	0.227	0.201	0.444	0.346	0.433		TS2/16	112.85	94.88	115.06	231.12	254.11	222.09
	0.222	0.188		0.499	0.409			8E3 Ab	177.81	169.29	165.85	108.13	112.47	107.32
									156.09			95.92
Figure 1D								HUTS-4	149.08	178.95	157.19	79.96	91.83	127.81
	HAV RNA/µg total RNA (% siCtrl)								142.83			129.28
	Naked HAV			eHAV
Ctrl	93.94	102.02	104.04	99.15	93.89	106.96
VCAM1	105.15	82.38	92.11	79.68	64.01	68.41
ICAM1	98.78	106.75	105.23	90.39	100.08	104.85
TSPAN8	99.37	115.86	103.79	120.68	90.69	111.34
ITGB1	26.15	32.38	39.38	13.81	11.99	17.63
ITGB3	108	78.54	96.18	112.41	90.78	89.15
ITGA1	68.93	70.06	75.81	88.04	90.99	97.67
ITGA2	110.32	104	109.35	91.4	98.03	110.11
ITGA3	94.89	97.94	89.51	96.83	89.06	94.65
ITGA4	111.64	106.01	91.31	111.72	97.18	96.35
ITGA5	104.06	96.38	98.6	114.26	106.05	116.17
ITGAV	109.43	99.15	115.46	107.51	103.5	97.86
ITGA6	95.79	93.32	91.27	86.7	88.2	96.58
ITGA7	111.98	107.66	97.16	100.26	94.87	99.21
ITGA8	83.37	81.42	97.28	80.43	83.52	96.31
ITGA9	78.69	97.34	87.52	85.85	94.42	97.95
