# Supplementary material for: Cellular entry and uncoating of naked and quasi-enveloped human hepatoviruses
Source: eLife journal article supplement (doi:10.7554/elife.43983), 2019-02-25
Supplement: supp [file elife-43983-supp-v1.zip › elife_poa_e43983_Figure_2_source_data_1.xlsx]

## Sheet: Figure 2
Rivera-Serrano EE, González-López O, Das A, and Lemon SM - HAV and eHAV entry (eLife 43983)
SOURCE DATA - FIGURE 2
Figure 2A and 2C								Figure 2-figure supplement 5
	Colocalization Index								Colocalization Index
	Naked HAV			eHAV				siCtrl	0.652	0.661	0.578	0.55	0.616
Rab5A	0.436	0.506	0.34	0.368	0.446	0.39		siALIX	0.253	0.222	0.205	0.28	0.202
	0.373	0.4		0.376	0.335			siCHMP1B	0.513	0.499	0.593	0.526	0.582
Rab7A	0.423	0.411	0.565	0.737	0.589	0.649		siCHMP2A	0.517	0.515	0.513	0.566	0.552
	0.475	0.491		0.548	0.703
Rab11A	0.095	0.13	0.111	0.072	0.153	0.129
	0.087	0.158		0.075	0.094
LAMP1	0.168	0.208	0.23	0.691	0.707	0.796
	0.248			0.722
Figure 2B
	HAV RNA/µg total RNA (% siCtrl)
	Naked HAV			eHAV
Ctrl	99.37	100.63	104.11	108.51	91.49	99.88
Rab5A	59.97	58.79	51.04	24.03	40.98	39.98
Rab7A	57.65	64.52	62.46	31.59	40.34	32
Rab11A	115.07	125.7	98.23	110.06	125.84	103.99
Figure 2E - left panel
	Colocalization Index
	siCtrl			siALIX
eHAV / LAMP1	0.551	0.488	0.567	0.032	0.101	0.061
	0.568	0.492		0.152	0.055
Figure 2E - right panel
	HAV GE/µg total RNA
	Naked HAV			eHAV
siCtrl	4360000	5620000		3370000	3790000
siALIX	2070000	3500000		212000	205000
