# Supplementary material for: Cellular entry and uncoating of naked and quasi-enveloped human hepatoviruses
Source: eLife journal article supplement (doi:10.7554/elife.43983), 2019-02-25
Supplement: supp [file elife-43983-supp-v1.zip › elife_poa_e43983_Figure_3_source_data_1.xlsx]

## Sheet: Figure 3
Rivera-Serrano EE, González-López O, Das A, and Lemon SM - HAV and eHAV entry (eLife 43983)
SOURCE DATA - FIGURE 3
Figure 3A								Figure 3-figure supplement 2
	HAV RNA/µg total RNA (% siCtrl)								Colocalization Index
	Naked HAV			eHAV				8 hpi	0.54	0.521	0.44	0.408
Ctrl	102.42	97.58	99.41	97.07	102.93	107.12			0.35	0.52	0.326
NPC1	115.6	106.07	103.33	71.91	67.2	73.35		24 hpi	0.678	0.665	0.787	0.834
LAL	94.07	89.29	95.92	58.69	64.17	60.67			0.601	0.809	0.789
LAMP1	86.81	110.23	107.74	101.73	92.45	98.1
Figure 3B
	HAV RNA/µg total RNA (% DMSO)
	Naked HAV			eHAV
DMSO	107	93	102.22	96.7	103.3	83.94
U18666A	116.86	84.98	97.37	74.67	61.37	57.73
Lalistat-2	93.93	109.55	89.93	63.95	65.21	72.64
U18666A + Lalistat-2	95	87.92	105.14	33.94	30.71	33.53
Figure 3E
	Ratio of HAV+PKH26+/HAV-PKH26+
	DMSO				Lalistat-2
6 hpi	1.4	2	1.33	3.5	1.8	3.25	1.25	3.4
	1.8	1.29	1.65		2.43	1.55
8 hpi	0.43	1.33	0.71	1	0.69	1.8	2.75	1.36
	0.5	0.5	0.8		5	1.57	1.44
12 hpi	0.2	0.08	0.22	0.28	0.9	1.86	1.38	0.86
	0.13	0.2	0.17		1.18	1.67	1.55
Figure 3F
	HAV RNA (HAV GE/well)
	Naked HAV		eHAV
Ctrl Serum+DMSO	3020000000	3260000000	138000000	150000000
JC + DMSO, 1 hpi	1790000000	2070000000	1640000	1110000
JC + DMSO, 2 hpi	1430000000	1630000000	5750000	11900000
JC + DMSO, 4 hpi	4950000000	3360000000	83500000	98800000
JC + DMSO, 6 hpi	3540000000	3250000000	220000000	223000000
JC + DMSO, 8 hpi	5980000000	3450000000	314000000	197000000
JC + DMSO, 10 hpi	4660000000	4090000000	301000000	254000000
JC + DMSO, 12 hpi	3390000000	8440000000	521000000	551000000
JC + DMSO, 24 hpi	4610000000	4480000000	323000000	348000000
Ctrl Serum+Lali2	4300000000	4990000000	313000000	290000000
JC + Lali2, 1 hpi	1900000000	1840000000	653000	758000
JC + Lali2, 2 hpi	2740000000	2320000000	871000	518000
JC + Lali2, 4 hpi	4070000000	4140000000	26900000	25800000
JC + Lali2, 6 hpi	2210000000	3160000000	81200000	75500000
JC + Lali2, 8 hpi	4920000000	2460000000	361000000	308000000
JC + Lali2, 10 hpi	4610000000	3900000000	260000000	252000000
JC + Lali2, 12 hpi	5690000000	7420000000	246000000	432000000
JC + Lali2, 24 hpi	5630000000	6630000000	468000000	743000000
