# Supplementary material for: Cellular entry and uncoating of naked and quasi-enveloped human hepatoviruses
Source: eLife journal article supplement (doi:10.7554/elife.43983), 2019-02-25
Supplement: supp [file elife-43983-supp-v1.zip › elife_poa_e43983_Figure_4_source_data_1.xlsx]

## Sheet: Figure 4
Rivera-Serrano EE, González-López O, Das A, and Lemon SM - HAV and eHAV entry (eLife 43983)
SOURCE DATA - FIGURE 4
Figure 4B
	HAV-NanoLuc activity (LU)
	Mock			Mock + GnHCl			eHAV			eHAV + GnHCl			Naked HAV			Naked HAV + GnHCl
2 hpi	0	0	0	0	0	1	3	3	4	4	4	3	3	3	4	3	4	5
4 hpi	0	0	1	0	0	1	4	4	4	4	4	4	7	6	8	5	8	6
6 hpi	1	0	0	1	1	0	5	4	4	5	5	4	14	13	14	14	13	13
8 hpi	0	0	1	0	1	0	9	7	9	8	9	8	18	20	18	18	18	16
10 hpi	0	1	1	0	0	1	9	8	8	8	8	7	18	18	22	17	19	18
12 hpi	0	0	0	1	0	0	11	10	10	11	11	10	22	24	20	22	24	24
14 hpi	1	0	0	1	1	0	13	12	13	13	13	11	36	32	36	26	25	22
16 hpi	1	0	2	1	0	0	21	20	18	18	20	16	64	64	58	32	26	28
20 hpi	1	2	1	0	0	1	32	34	33	20	19	19	72	68	78	30	34	26
26 hpi	1	2	1	0	0	1	104	107	110	27	24	31	320	310	310	37	32	32
Figure 4D								Figure 4-figure supplement 1B
	% Protein Synthesis								% Protein Synthesis
	Control		plus anti-HAV						Control		plus anti-HAV
Mock	97.17	92.12	98.66	94.96				Mock	88.99	75.62	106.84	108.93
eHAV	60.96	58.19	89.15	86.61				eHAV	66.77	63.55	98.35	91.69
Naked HAV	90.46	101.67	92.72	97.69				Naked HAV	104.99	100	98.25	103.33
HRV14	37.26	33.78	35.89	31				HRV14	34	29.71	36.17	33.5
Figure 4E
	Number of dextran+ compartments per cell
	Mock						Naked HAV						eHAV
6 hpi	8	13	8	12	19	Mean	9	12	12	13	8	Mean	1	2	0	0	1	Mean
	22	14	16			14	19	6	18	13	9	11.9	3	6	4	0	2	1.9
12 hpi	7	15	9	5	13	Mean	9	19	17	8	11	Mean	0	0	0	1	0	Mean
	13	10				10.2857	17	6	8	13	9	11.7	3	0	0	2	2	0.8
