# Supplementary material for: Cellular entry and uncoating of naked and quasi-enveloped human hepatoviruses
Source: eLife journal article supplement (doi:10.7554/elife.43983), 2019-02-25
Supplement: supp [file elife-43983-supp-v1.zip › elife_poa_e43983_Figure_5_source_data_1.xlsx]

## Sheet: Figure 5
Rivera-Serrano EE, González-López O, Das A, and Lemon SM - HAV and eHAV entry (eLife 43983)
SOURCE DATA - FIGURE 5
Figure 5A
	HAV-NanoLuc activity (LU)
	Naked HAV		eHAV
Wild type	18	20	11	8
ΔPLA2G16	21	17	10	9
ΔLGALS8	17	16	9	8
Figure 5B - Naked HAV (left panel)
	WT-Mock			WT-nHAV			ΔPLA2G16-Mock			ΔPLA2G16-nHAV			ΔLGALS8-Mock			ΔLGALS8-nHAV
6 hpi	0	0	1	2	2	2	1	1	0	2	4	3	1	1	0	2	2	2
24 hpi	0	0	1	29	32	37	1	1	0	53	53	62	1	1	2	22	30	28
48 hpi	0	0	1	3103	2885	3268	1	2	1	9922	7977	8894	1	2	2	2222	2840	2519
72 hpi	0	1	4	40753	34865	33449	4	2	6	116139	88084	98015	3	2	2	18431	13946	15105
Figure 5B - eHAV (right panel)
	WT-Mock			WT-eHAV			ΔPLA2G16-Mock			ΔPLA2G16-eHAV			ΔLGALS8-Mock			ΔLGALS8-eHAV
6 hpi	0	0	1	0	0	1	1	1	0	1	1	1	1	1	0	1	2	2
24 hpi	0	0	1	15	17	22	1	1	0	22	25	19	1	1	2	13	11	14
48 hpi	0	0	1	1510	1766	1607	1	2	1	6639	5947	6772	1	2	2	1419	1534	1322
72 hpi	0	1	4	8134	9124	8281	4	2	6	29361	32758	28769	3	2	2	7655	6972	8478
Figure 5C												Figure 5-figure supplement 1A
	HAV-FLuc activity (LU)					HAV-Fluc Δ3DPOL activity (LU)							HAV RNA/µg total RNA (Fold change)
	sgCtrl		sgPLA2G16			sgCtrl		sgPLA2G16				a	1.11	0.89
24 h	1150	1268	1702	1654		112	109	134	140			ΔPLA2G16	13.14	17.77
48 h	3030	3066	4896	4590		18	16	28	25			ΔLGALS8	0.28	0.21
72 h	5536	5152	36600	35112		8	8	10	10
												Figure 5-figure supplement 2A
Figure 5D (top graph)													HAV RNA/µg total RNA (Fold change)
	Colocalization Index with PLA2G16											Wild type	1.01	0.95	1.04
Naked HAV	0.167	0.139	0.157	0.201	0.145	0.166	0.13	0.189				siPLA2G16	9.51	9.73	9.88
eHAV	0.302	0.353	0.304	0.234	0.352	0.348	0.37	0.321				siLGALS8	1.02	1.03	1.01
Figure 5D (bottom graph)												Figure 5-figure supplement 2B
	Number of PLA2G16+ HAV+ vesicles per cell												HAV NanoLuc activity (LU)
Naked HAV	1	0	0	2	1	0							sgCtrl			sgPLA2G16
	0	2	0	1	1	0						24 hpi	9	13	17	11	16	15
eHAV	5	3	1	4	3	3						48 hpi	92	81	93	234	336	257
	2	4	1	3	2	2						72 hpi	994	1087	1053	2600	3445	2509
