# Supplementary figures and images for: Cellular entry and uncoating of naked and quasi-enveloped human hepatoviruses
Source: eLife journal article supplement (doi:10.7554/elife.43983), 2019-02-25

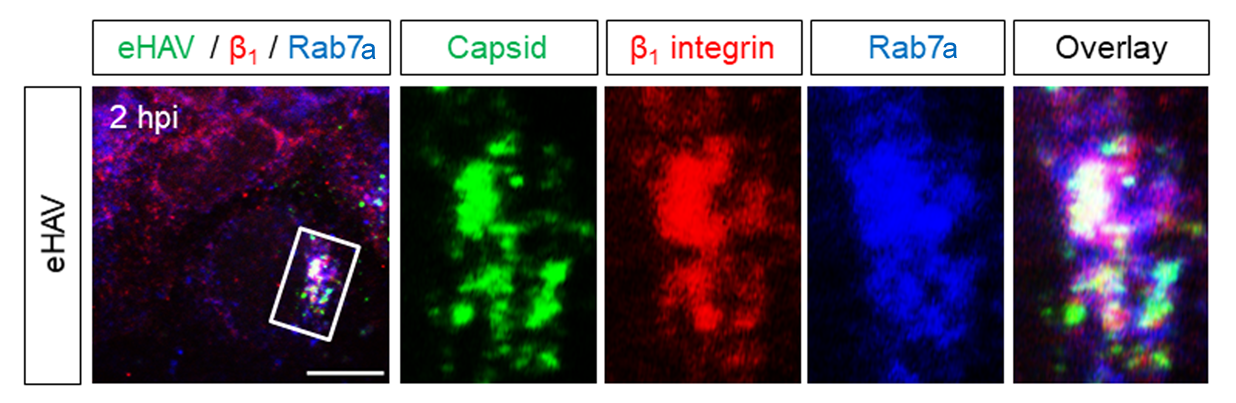

Supplement: supp [file elife-43983-supp-v1.zip › elife_poa_e43983_Figure_2_figure_supplement_3.tif]

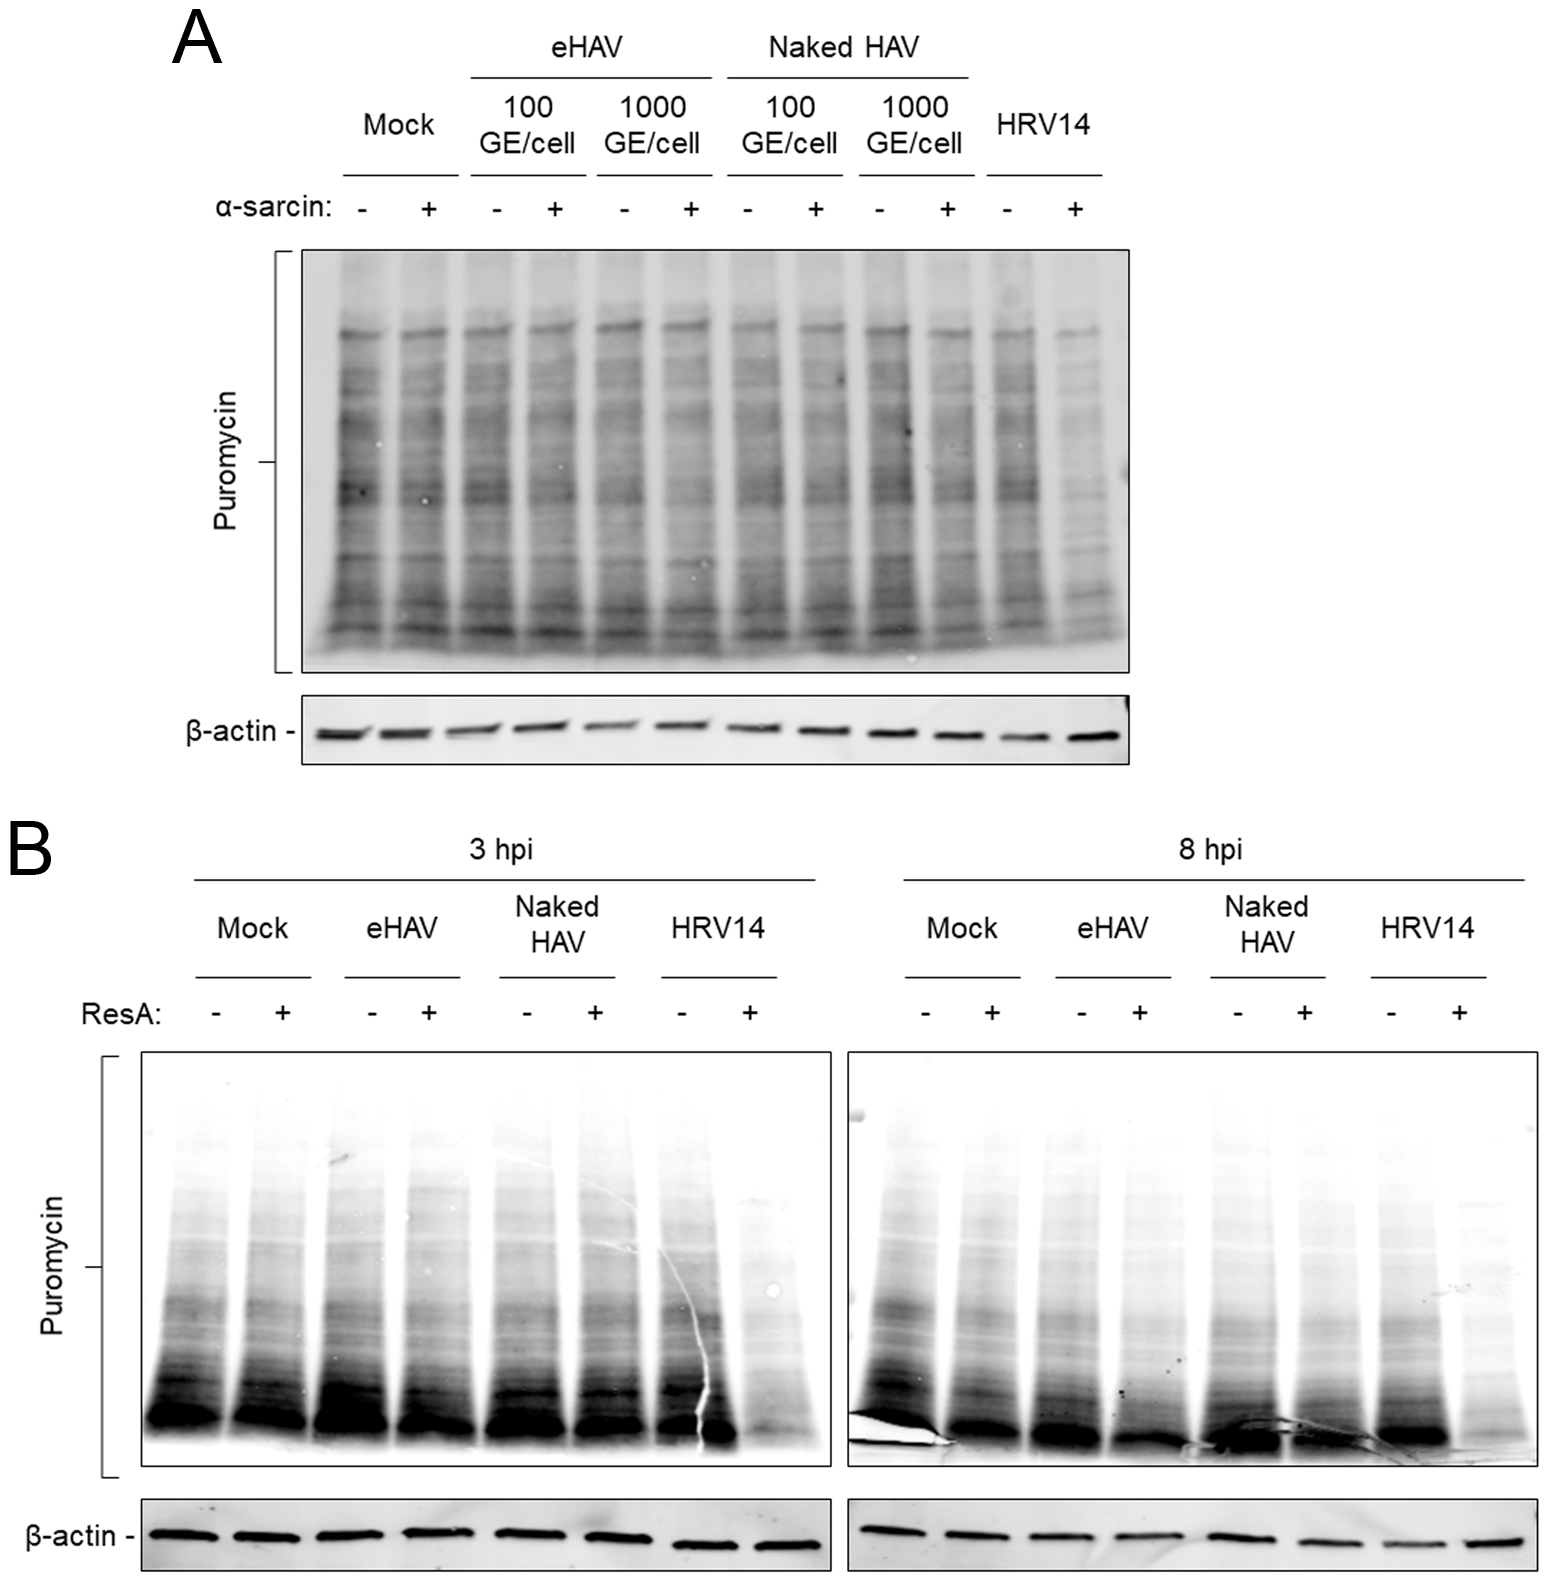

Supplement: supp [file elife-43983-supp-v1.zip › elife_poa_e43983_Figure_4_figure_supplement_2.tif]

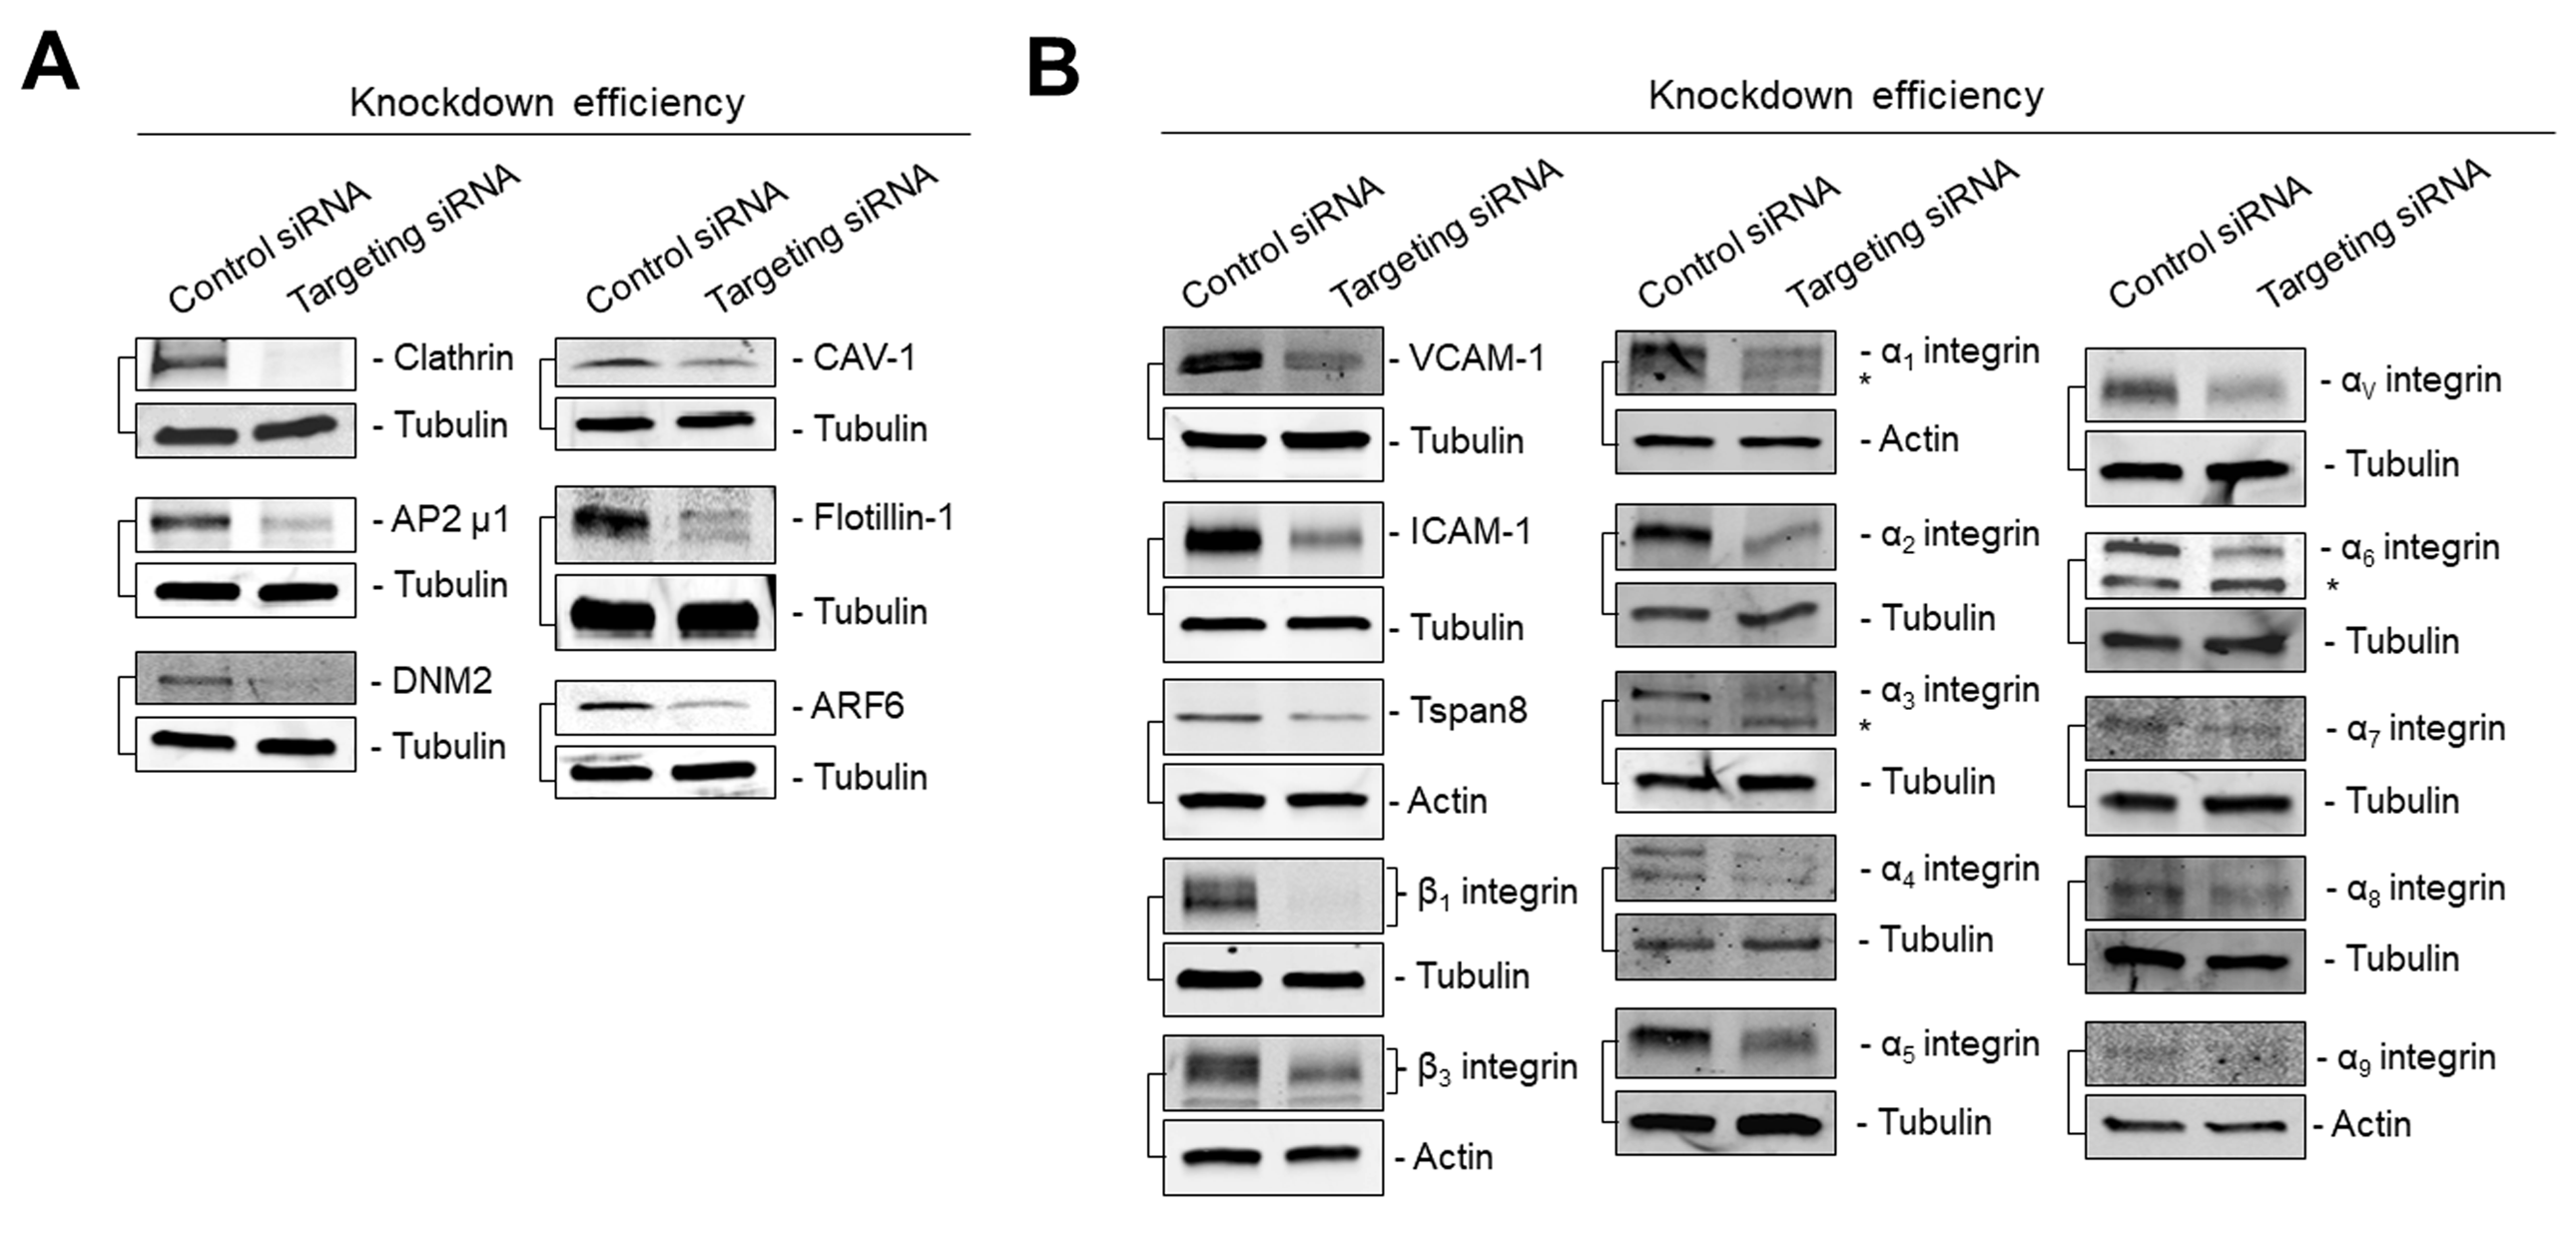

Supplement: supp [file elife-43983-supp-v1.zip › elife_poa_e43983_Figure_1_figure_supplement_2.tif]

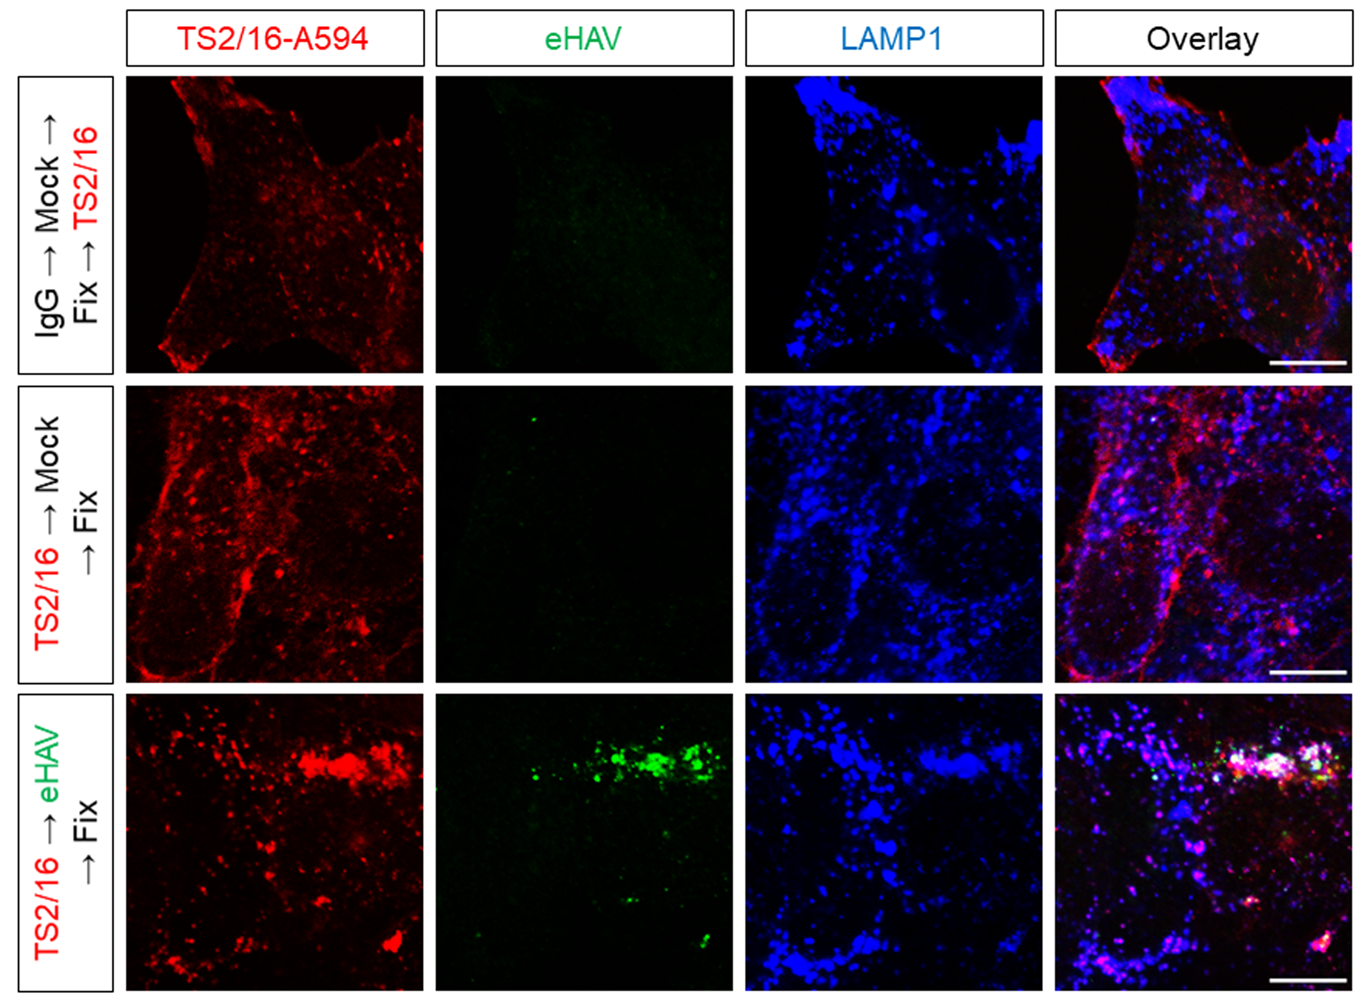

Supplement: supp [file elife-43983-supp-v1.zip › elife_poa_e43983_Figure_2_figure_supplement_4.tif]

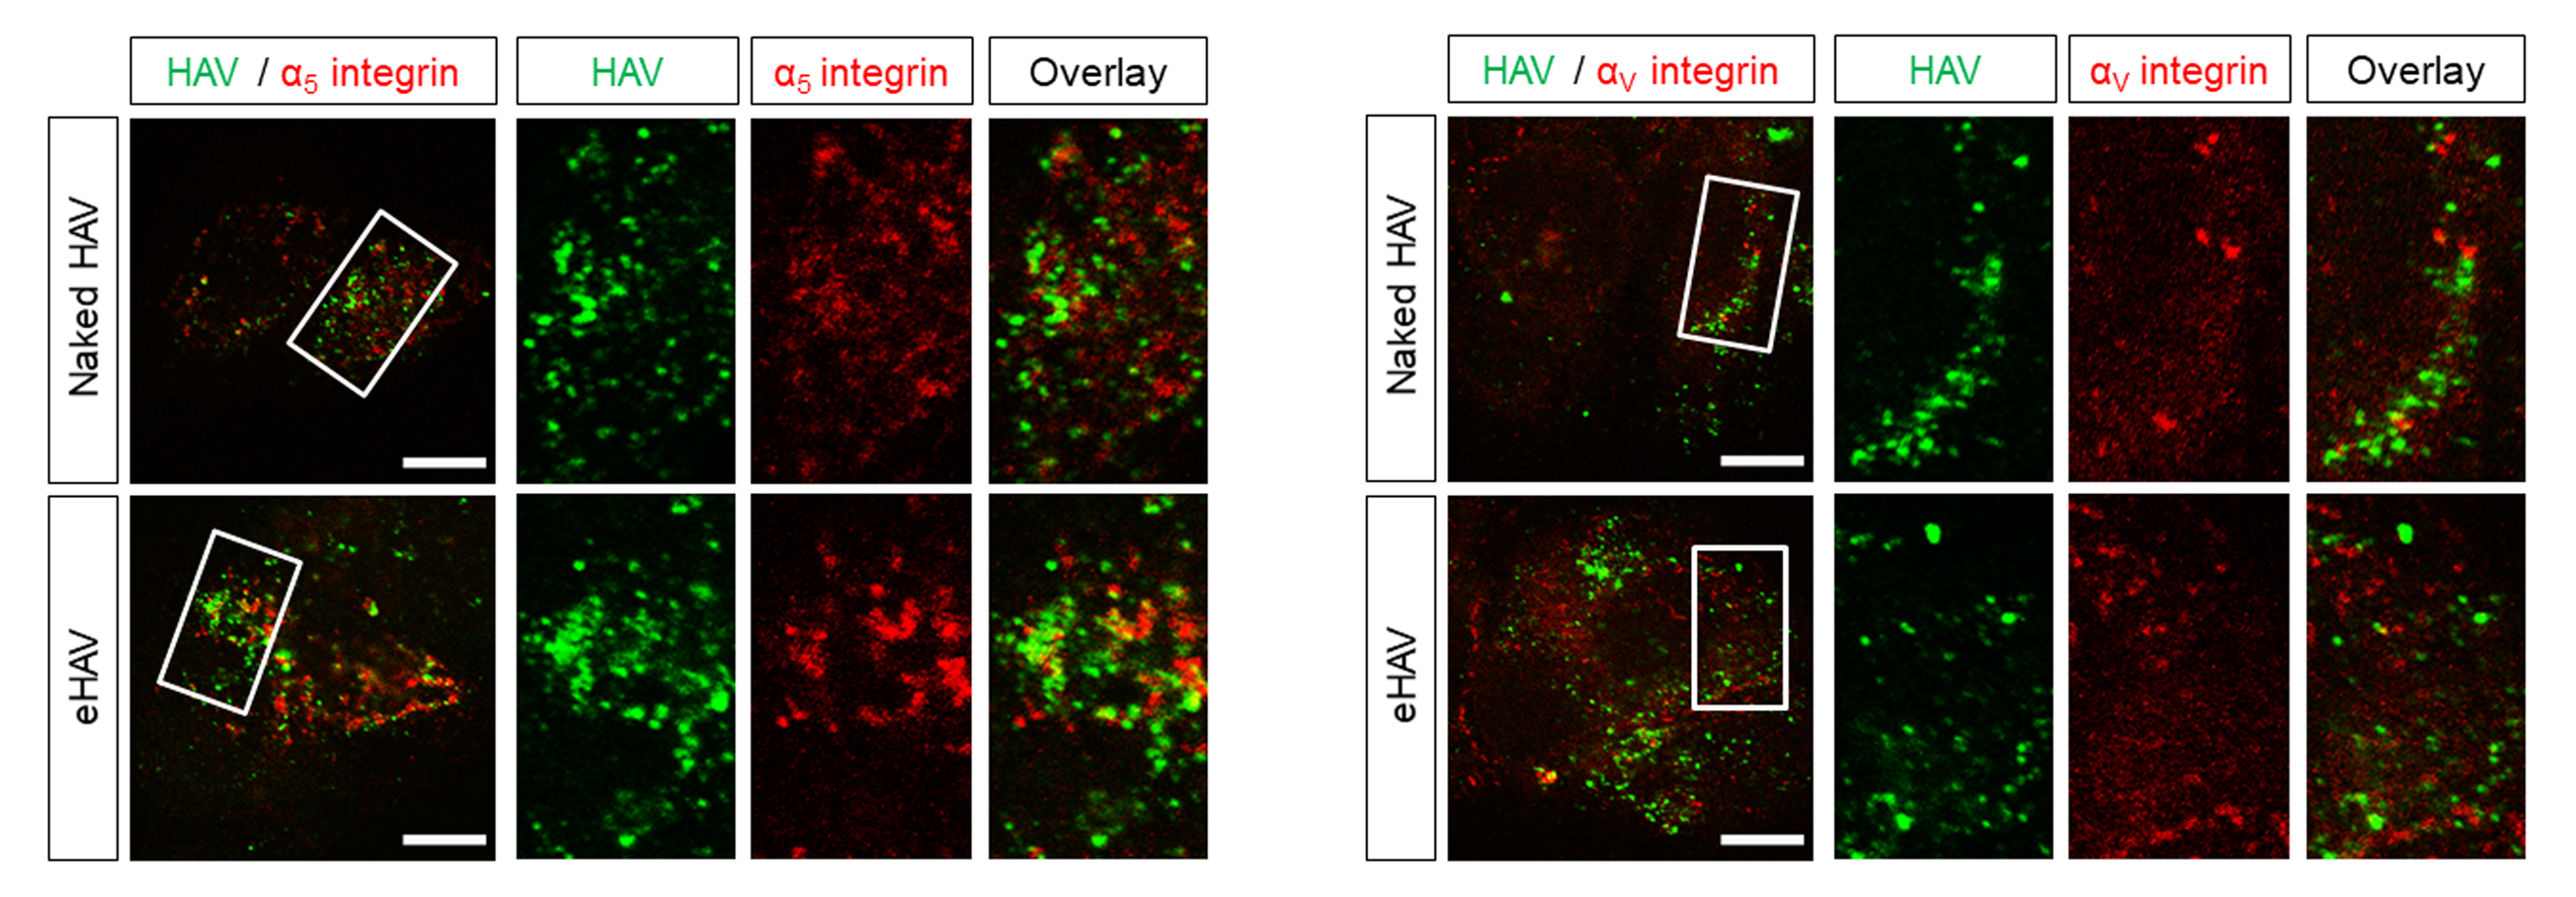

Supplement: supp [file elife-43983-supp-v1.zip › elife_poa_e43983_Figure_1_figure_supplement_4.tif]

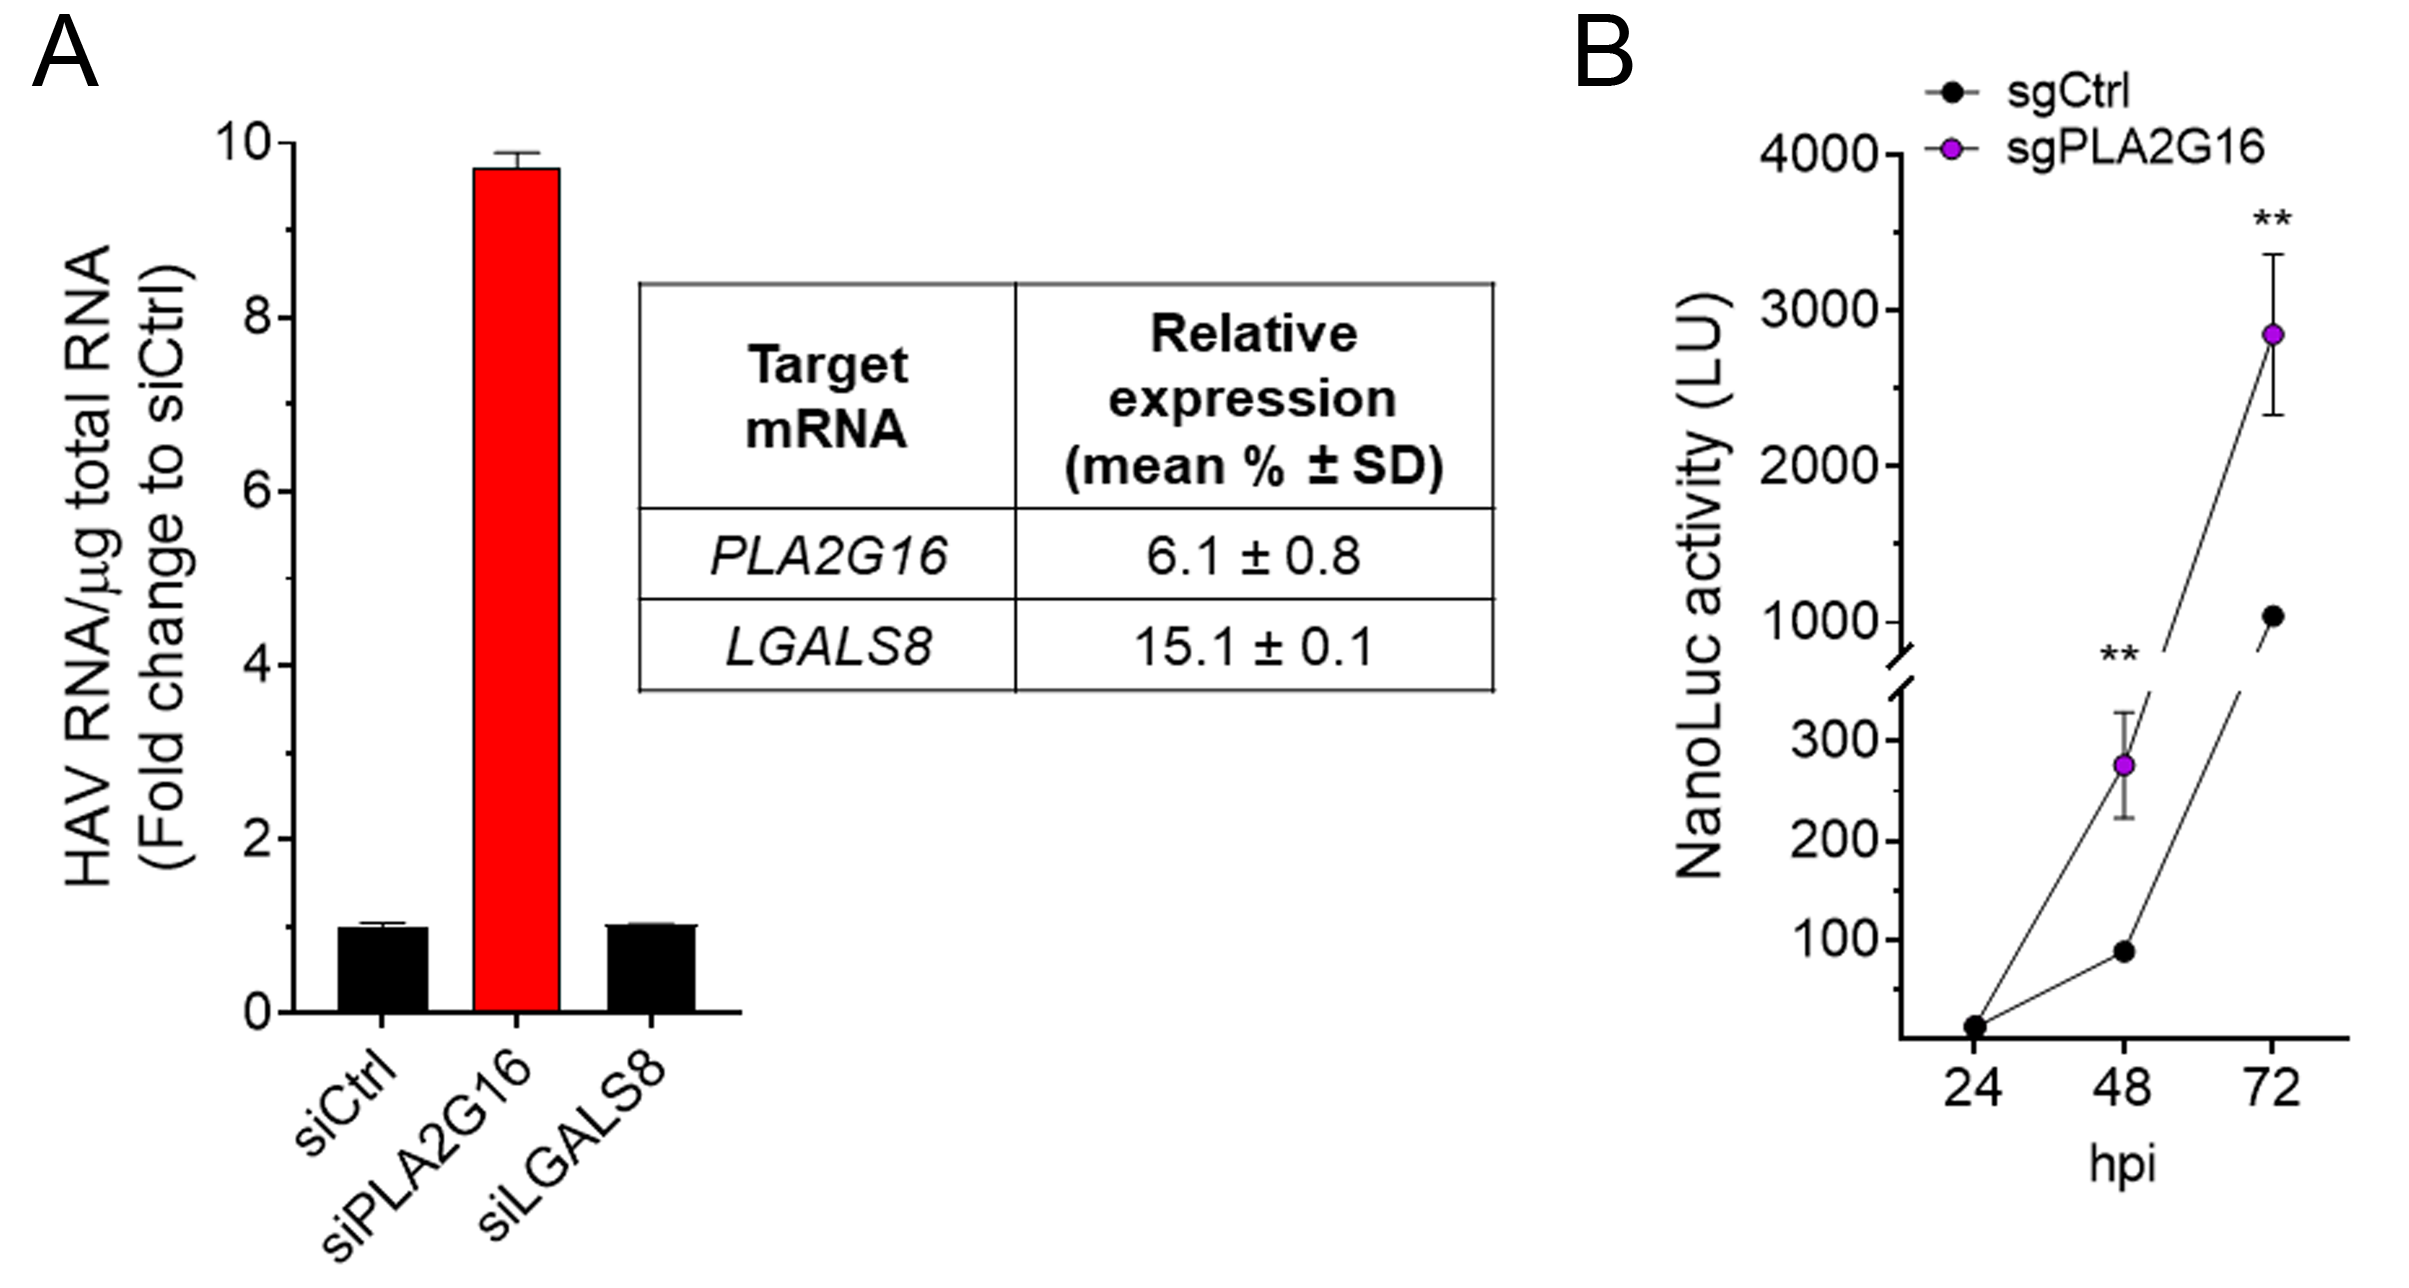

Supplement: supp [file elife-43983-supp-v1.zip › elife_poa_e43983_Figure_5_figure_supplement_2.tif]

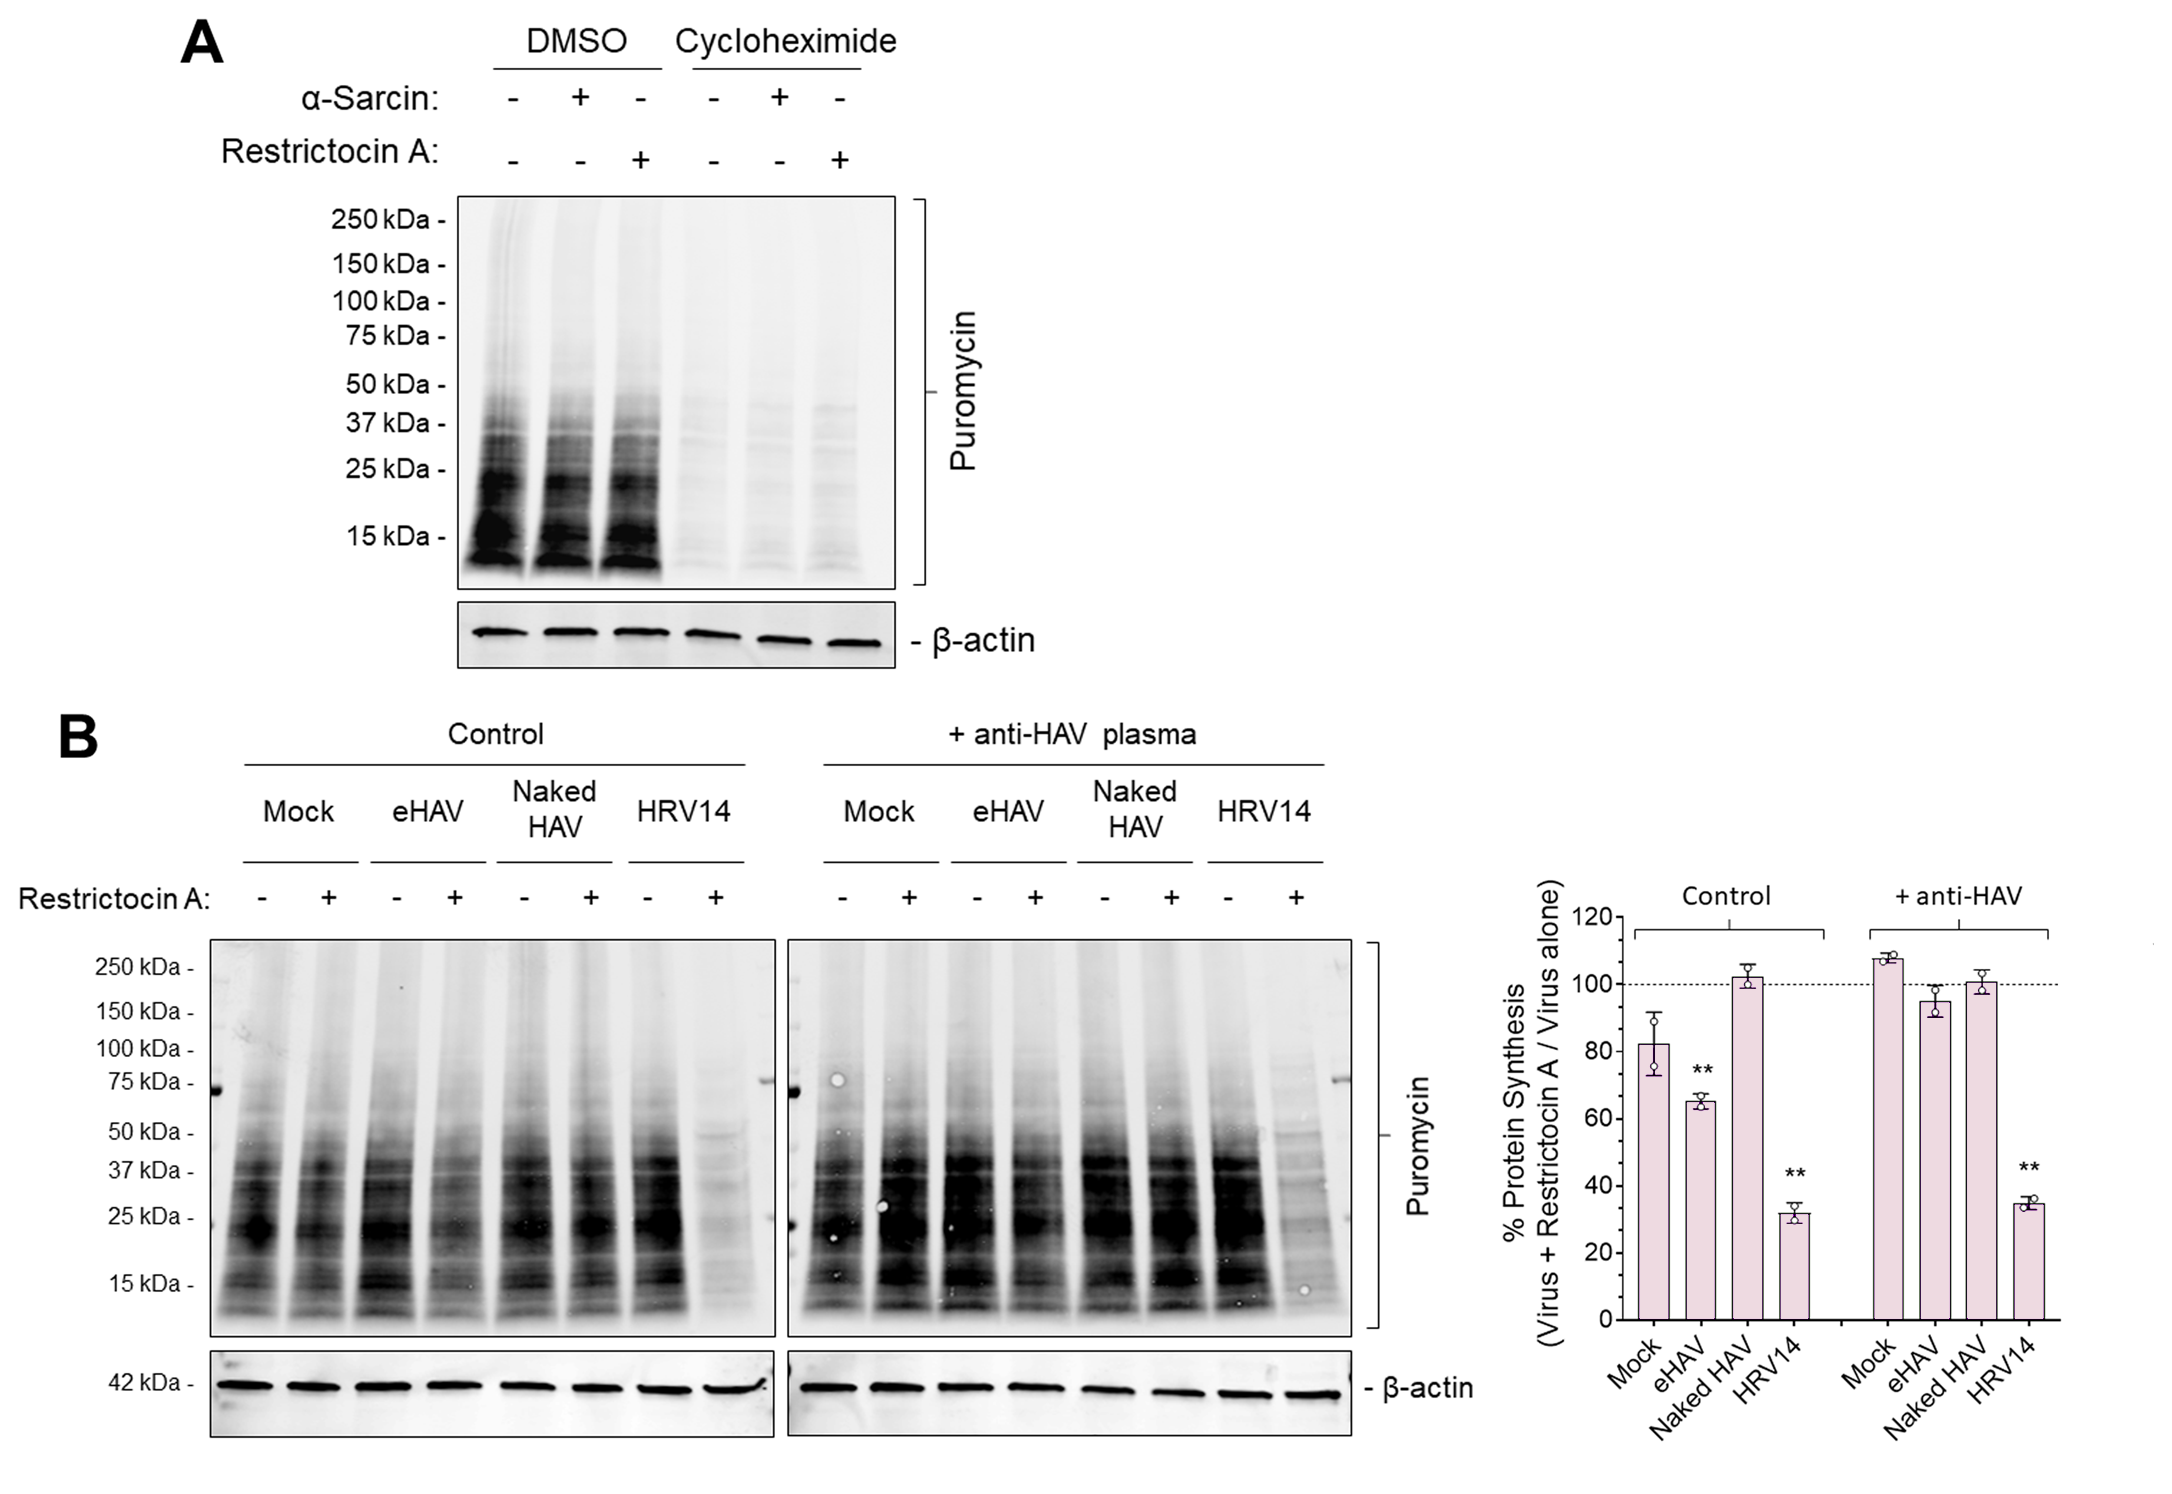

Supplement: supp [file elife-43983-supp-v1.zip › elife_poa_e43983_Figure_4_figure_supplement_1.tif]

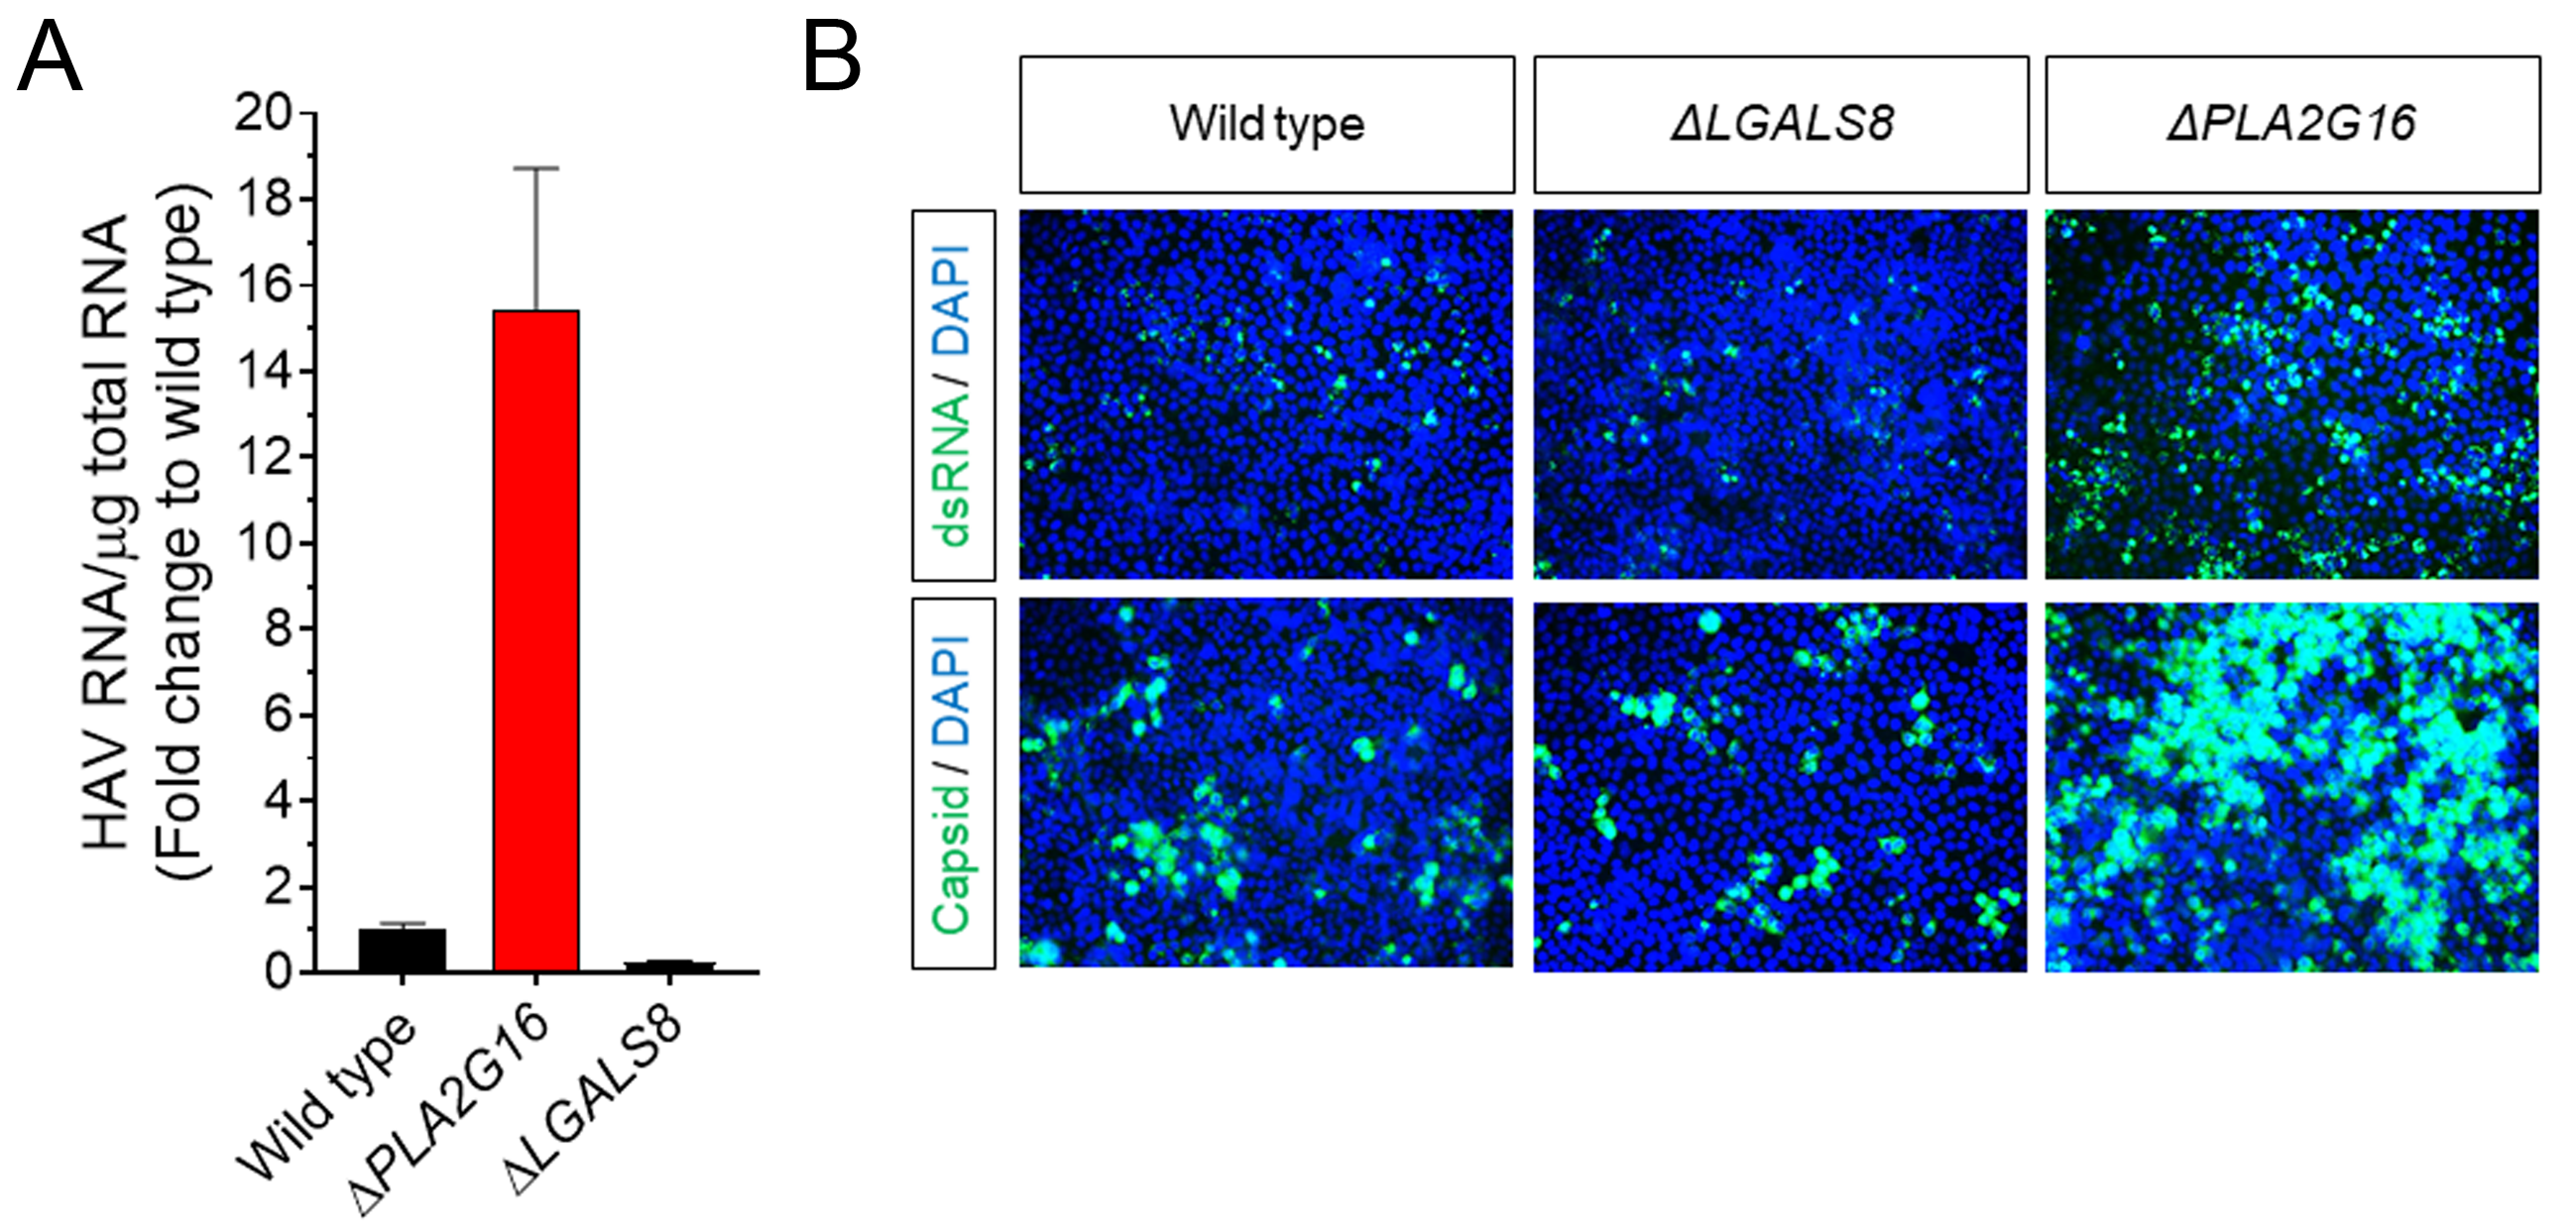

Supplement: supp [file elife-43983-supp-v1.zip › elife_poa_e43983_Figure_5_figure_supplement_1.tif]

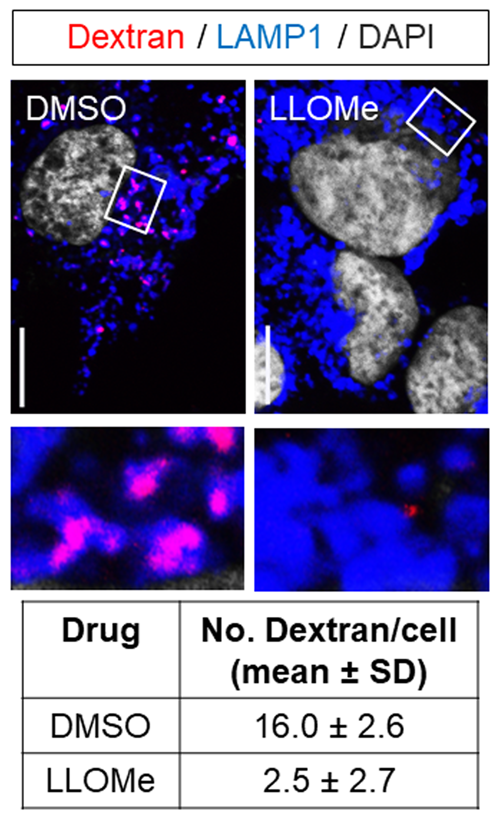

Supplement: supp [file elife-43983-supp-v1.zip › elife_poa_e43983_Figure_4_figure_supplement_3.tif]

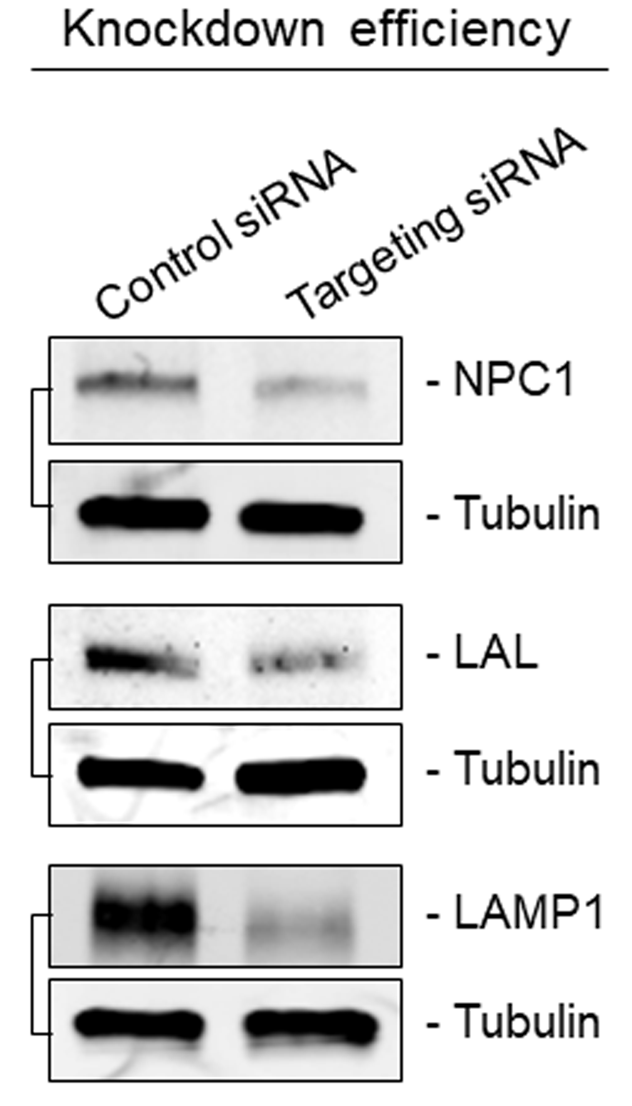

Supplement: supp [file elife-43983-supp-v1.zip › elife_poa_e43983_Figure_3_figure_supplement_1.tif]

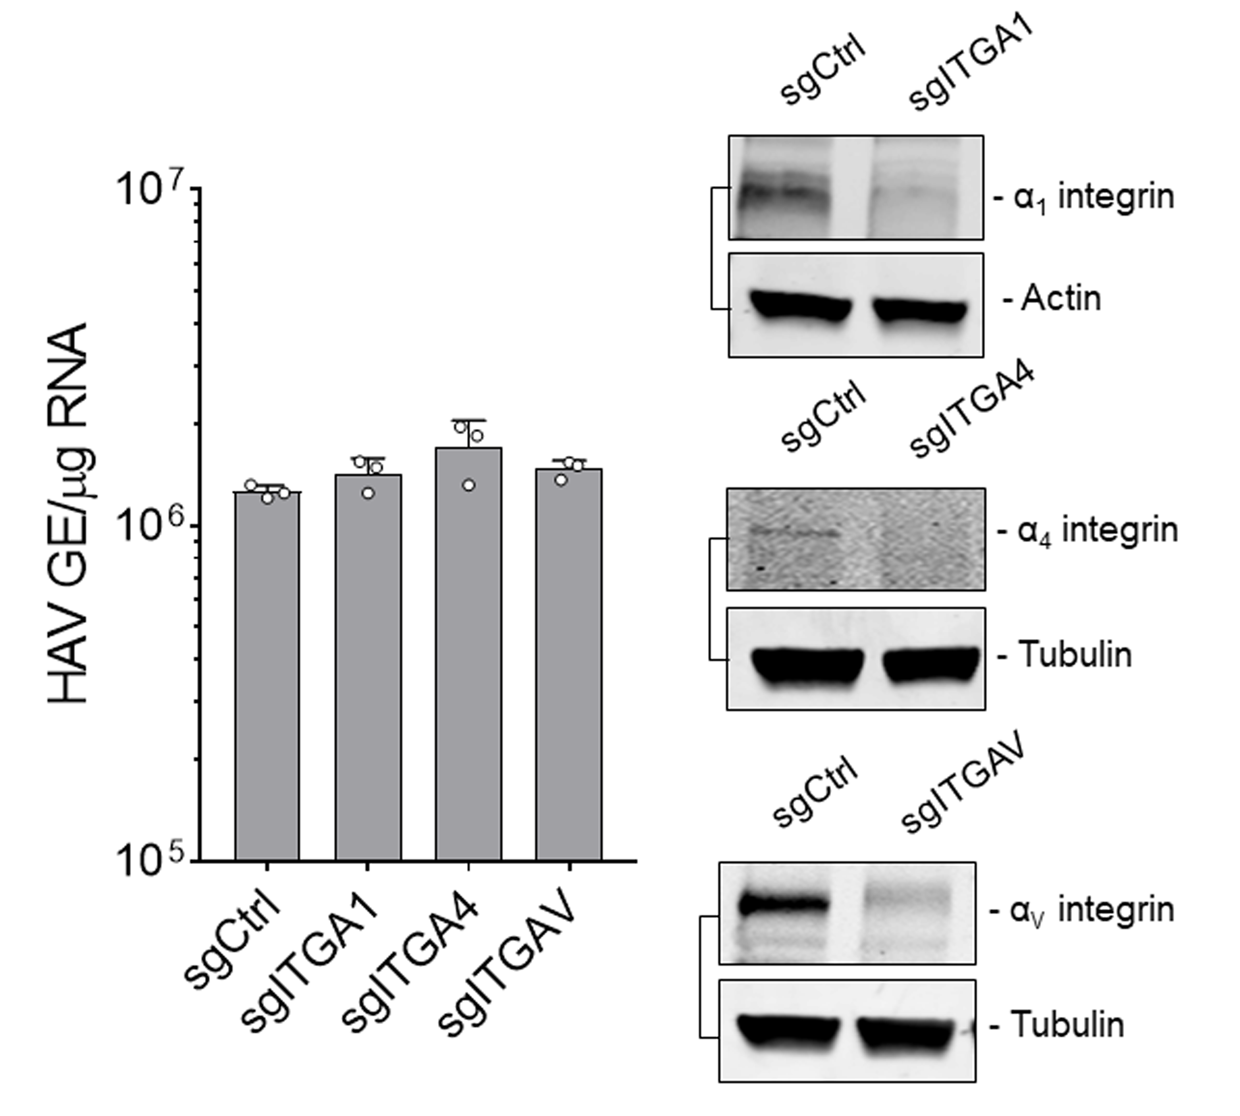

Supplement: supp [file elife-43983-supp-v1.zip › elife_poa_e43983_Figure_1_figure_supplement_3.tif]

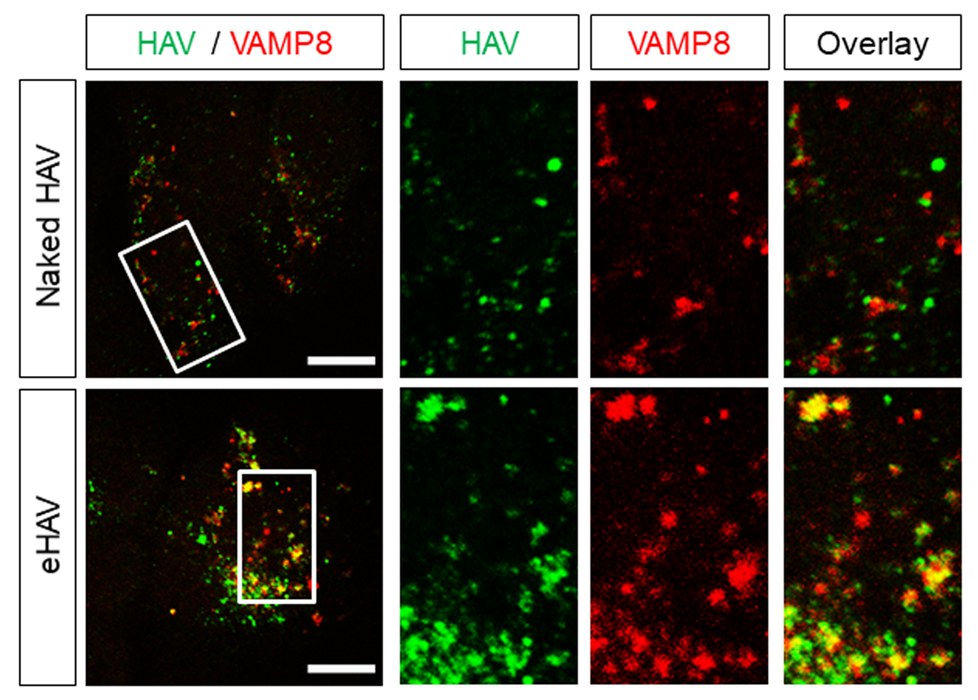

Supplement: supp [file elife-43983-supp-v1.zip › elife_poa_e43983_Figure_2_figure_supplement_2.tif]

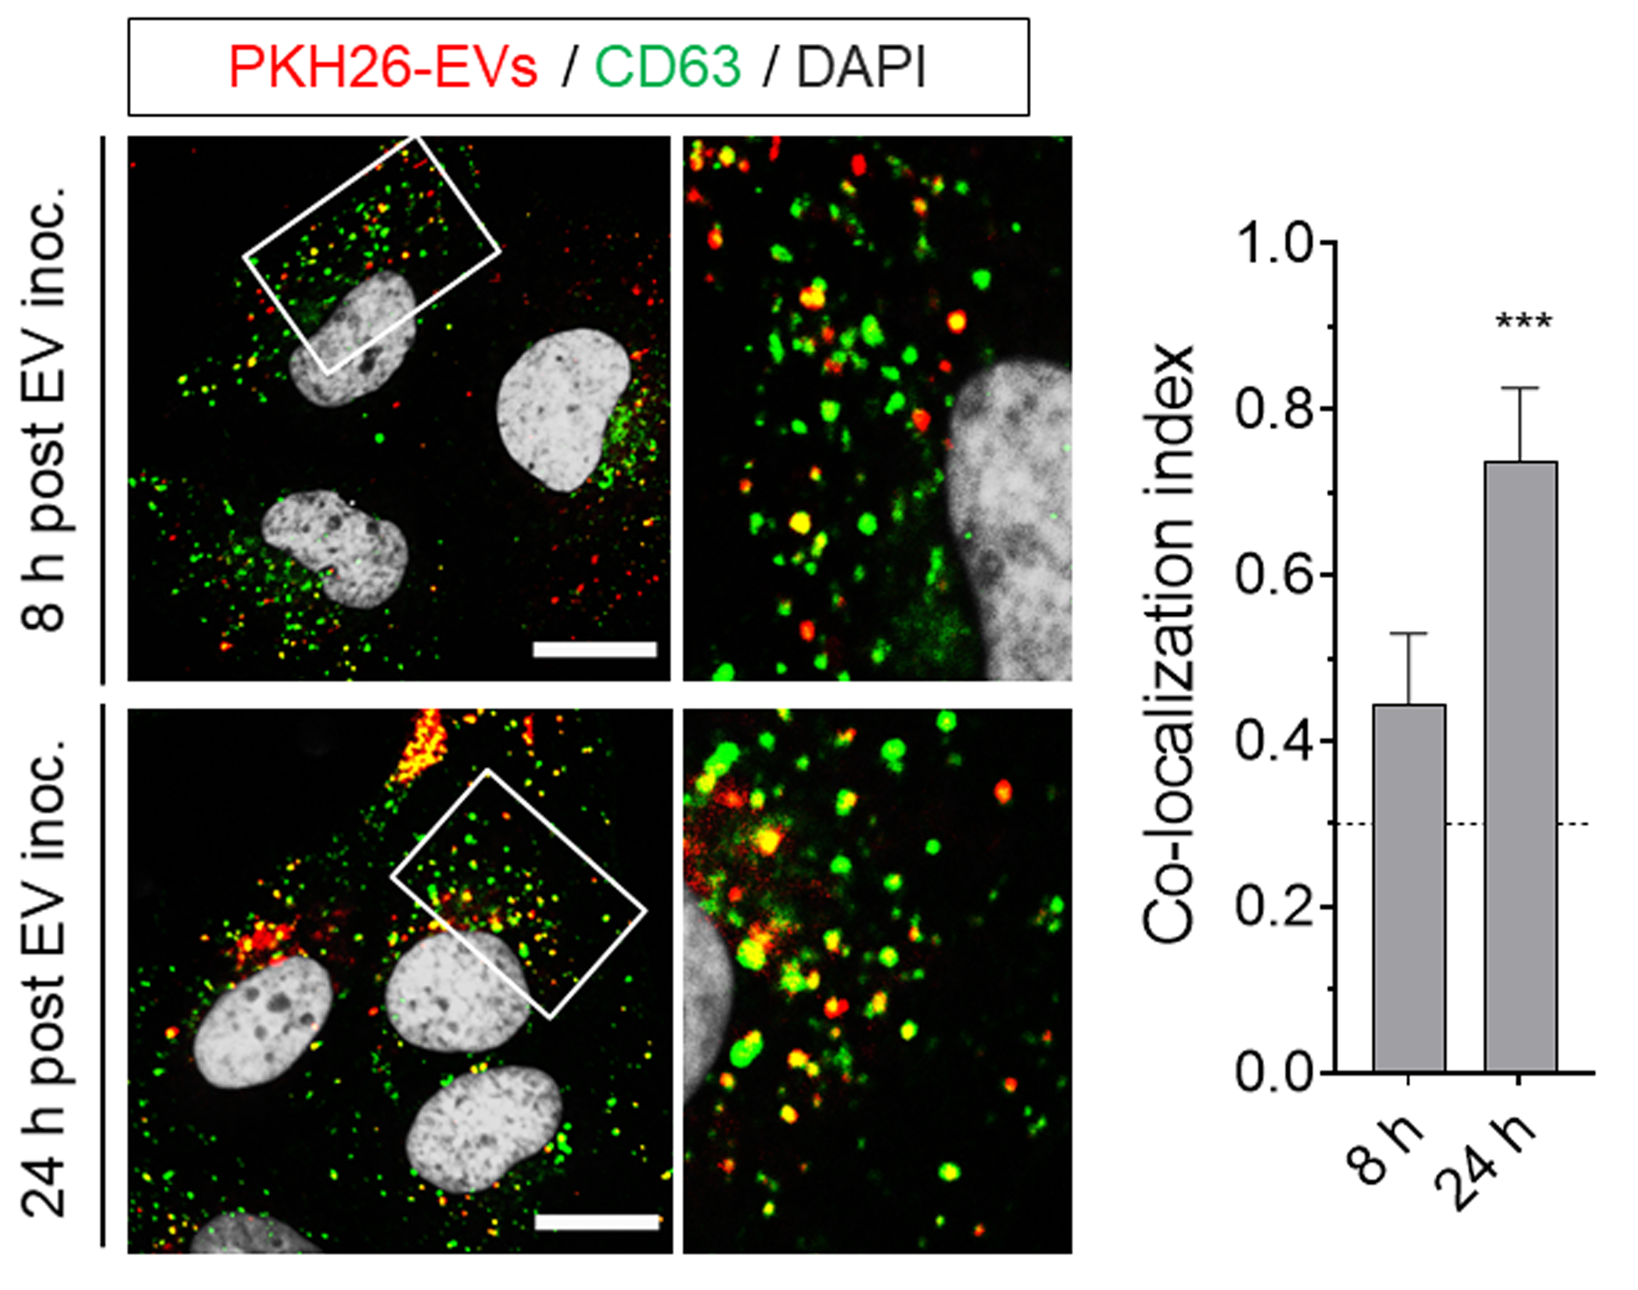

Supplement: supp [file elife-43983-supp-v1.zip › elife_poa_e43983_Figure_3_figure_supplement_2.tif]

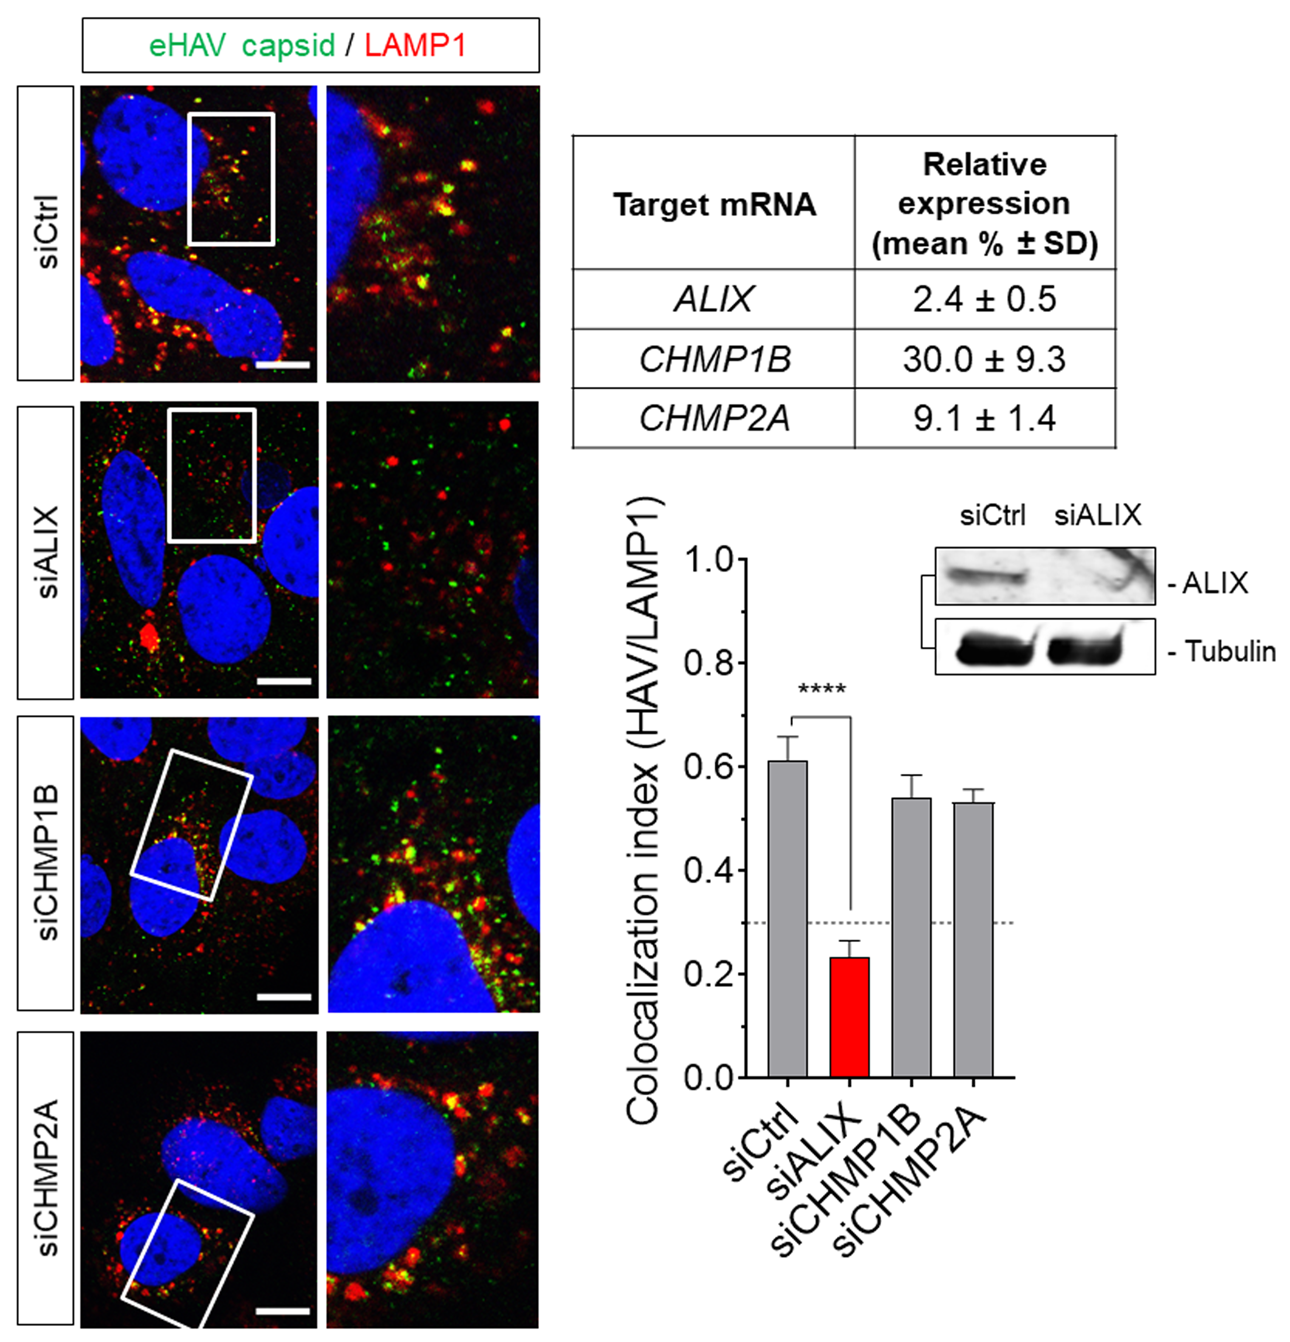

Supplement: supp [file elife-43983-supp-v1.zip › elife_poa_e43983_Figure_2_figure_supplement_5.tif]

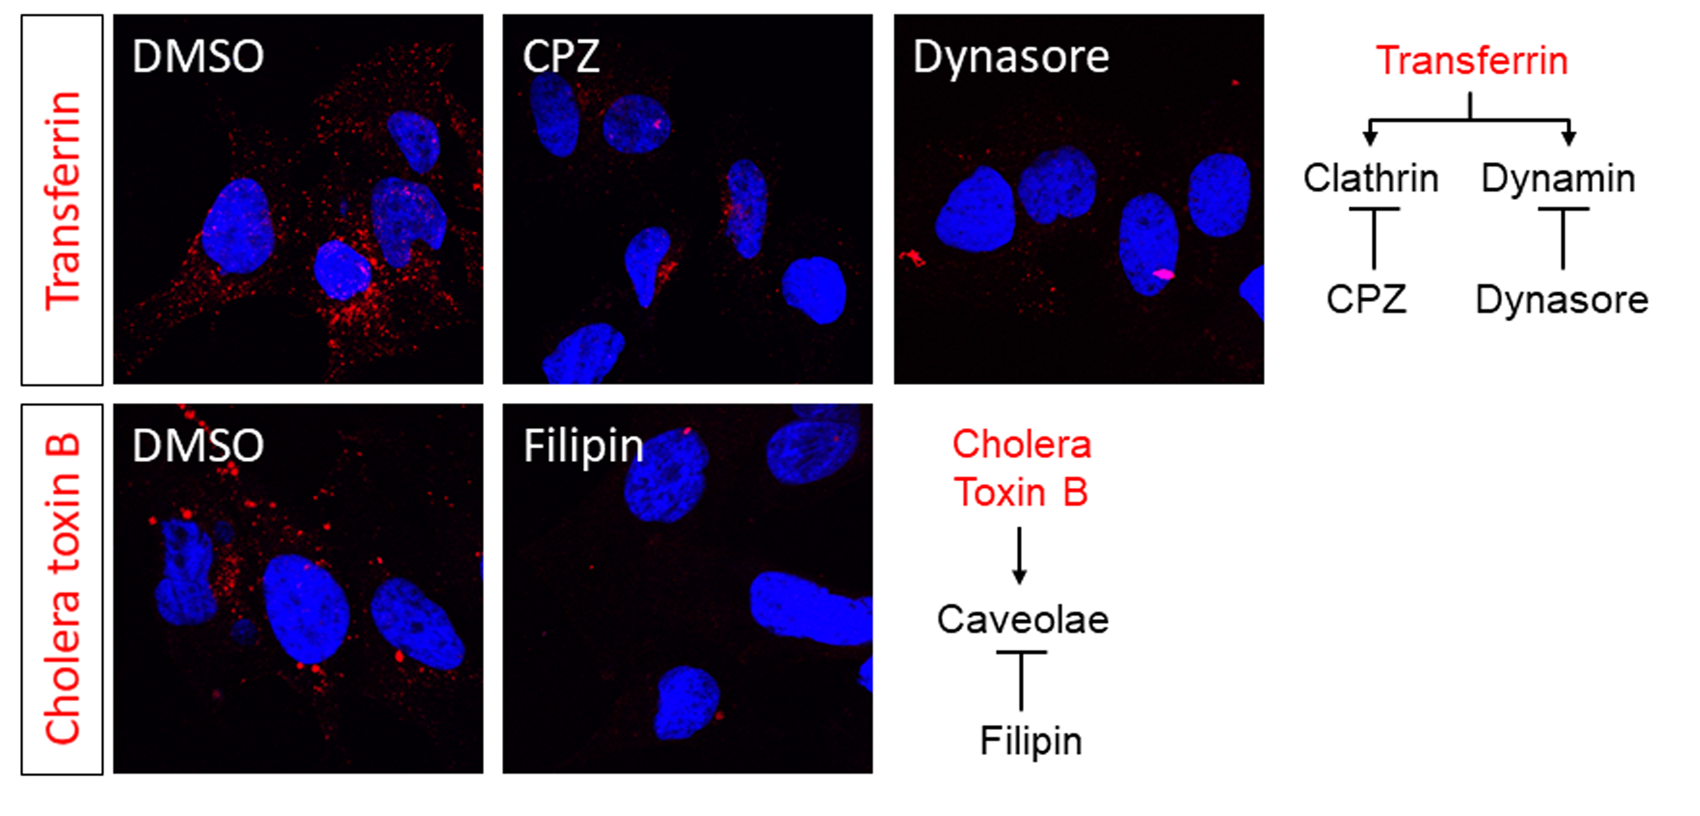

Supplement: supp [file elife-43983-supp-v1.zip › elife_poa_e43983_Figure_1_figure_supplement_1.tif]

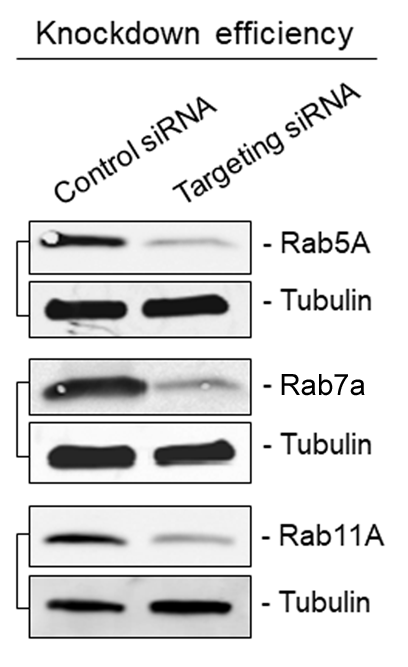

Supplement: supp [file elife-43983-supp-v1.zip › elife_poa_e43983_Figure_2_figure_supplement_1.tif]
